# Supplementary material for: Association of Myopia with cognitive function among one million adolescents
Source: PubMed Central journal article supplement (PMC7206693; doi:10.1186/s12889-020-08765-8), 2020-05-08
Supplement: 12889_2020_8765_MOESM1_ESM.pdf [file 12889_2020_8765_MOESM1_ESM.pdf]

**eTable 1.** Myopia prevalence by year of examination, univariable logistic regression analysis

| <b>Year of Examination</b> | <b>Adolescents with Myopia, No./Total No. (%)</b> | <b>OR (95% CI)</b> | <b>P Value</b> |
|----------------------------|---------------------------------------------------|--------------------|----------------|
| 1993                       | 16267/60536 (26.9)                                | 1 [Reference]      |                |
| 1994                       | 15173/55339 (27.4)                                | 1.028 (1.002-1.05) | .037           |
| 1995                       | 15486/53872 (28.7)                                | 1.098 (1.07-1.13)  | <.001          |
| 1996                       | 16919/59286 (28.5)                                | 1.087 (1.06-1.11)  |                |
| 1997                       | 13774/46921 (29.4)                                | 1.131 (1.10-1.16)  |                |
| 1998                       | 18028/55600 (32.4)                                | 1.306 (1.27-1.34)  |                |
| 1999                       | 20040/58653 (34.2)                                | 1.412 (1.38-1.45)  |                |
| 2000                       | 17501/51529 (34.0)                                | 1.400 (1.36-1.44)  |                |
| 2001                       | 19575/57140 (34.3)                                | 1.418 (1.38-1.45)  |                |
| 2002                       | 18343/56172 (32.7)                                | 1.320 (1.29-1.35)  |                |
| 2003                       | 18088/52457 (34.5)                                | 1.432 (1.39-1.47)  |                |
| 2004                       | 17478/50328 (34.7)                                | 1.448 (1.41-1.49)  |                |
| 2005                       | 17425/51906 (33.6)                                | 1.375 (1.34-1.41)  |                |
| 2006                       | 18624/54654 (34.1)                                | 1.407 (1.37-1.44)  |                |
| 2007                       | 17895/51968 (34.4)                                | 1.429 (1.39-1.47)  |                |
| 2008                       | 16174/46638 (34.7)                                | 1.445 (1.41-1.48)  |                |
| 2009                       | 19524/57411 (34.0)                                | 1.402 (1.37-1.44)  |                |
| 2010                       | 18643/54711 (34.1)                                | 1.407 (1.37-1.44)  |                |
| 2011                       | 15957/49659 (32.1)                                | 1.289 (1.25-1.32)  |                |
| 2012                       | 19742/59793 (33.0)                                | 1.341 (1.31-1.37)  |                |

**eTable 2.** Cognitive function assessment subtests and association with myopia in univariable and multivariable models

| Cognitive Assessment Subtest percentile | Unadjusted OR (95% CI) | Adjusted OR <sup>a</sup> (95% CI) | P value for unadjusted | P value for adjusted |
|-----------------------------------------|------------------------|-----------------------------------|------------------------|----------------------|
| <b>Verbal Instructions</b>              |                        |                                   |                        |                      |
| <P5                                     | 1.00 [Reference]       |                                   |                        |                      |
| P5-10                                   | 1.09 (1.05-1.13)       | 1.09 (1.05-1.13)                  | <.001                  | <.001                |
| P10-25                                  | 1.24 (1.20-1.27)       | 1.30 (1.26-1.34)                  |                        |                      |
| P25-50                                  | 1.54 (1.50-1.58)       | 1.66 (1.62-1.71)                  |                        |                      |
| P50-75                                  | 1.91 (1.87-1.96)       | 2.14 (2.09-2.20)                  |                        |                      |
| P75-90                                  | 2.26 (2.20-2.32)       | 2.55 (2.48-2.62)                  |                        |                      |
| P90-95                                  | 2.50 (2.43-2.57)       | 2.81 (2.73-2.89)                  |                        |                      |
| P>95                                    | 2.87 (2.79-2.95)       | 3.19 (3.10-3.28)                  |                        |                      |
| <b>Similarities</b>                     |                        |                                   |                        |                      |
| <P5                                     | 1.00 [Reference]       |                                   |                        |                      |
| P5-10                                   | 1.03 (1.00-1.06)       | 1.04 (1.01-1.07)                  | .043                   | .019                 |
| P10-25                                  | 1.19 (1.16-1.22)       | 1.21 (1.18-1.24)                  | <.001                  | <.001                |
| P25-50                                  | 1.44 (1.40-1.47)       | 1.48 (1.44-1.51)                  |                        |                      |
| P50-75                                  | 1.68 (1.64-1.72)       | 1.75 (1.71-1.79)                  |                        |                      |
| P75-90                                  | 1.90 (1.85-1.94)       | 2.00 (1.95-2.06)                  |                        |                      |
| P90-95                                  | 2.08 (2.03-2.14)       | 2.22 (2.16-2.29)                  |                        |                      |
| P>95                                    | 2.36 (2.30-2.42)       | 2.57 (2.50-2.64)                  |                        |                      |
| <b>Arithmetic</b>                       |                        |                                   |                        |                      |
| <P5                                     | 1.00 [Reference]       |                                   |                        |                      |
| P5-10                                   | 1.04 (1.00-1.08)       | 1.04 (1.01-1.08)                  | .029                   | .021                 |
| P10-25                                  | 1.15 (1.12-1.18)       | 1.17 (1.14-1.21)                  | <.001                  | <.001                |
| P25-50                                  | 1.28 (1.24-1.31)       | 1.35 (1.31-1.38)                  |                        |                      |
| P50-75                                  | 1.42 (1.38-1.46)       | 1.57 (1.53-1.61)                  |                        |                      |
| P75-90                                  | 1.62 (1.58-1.67)       | 1.86 (1.81-1.91)                  |                        |                      |
| P90-95                                  | 1.85 (1.80-1.91)       | 2.19 (2.12-2.26)                  |                        |                      |
| P>95                                    | 2.21 (2.14-2.28)       | 2.70 (2.62-2.79)                  |                        |                      |
| <b>Spatial</b>                          |                        |                                   |                        |                      |
| <P5                                     | 1.00 [Reference]       |                                   |                        |                      |
| P5-10                                   | 1.09 (1.06-1.12)       | 1.09 (1.06-1.13)                  | <.001                  | <.001                |
| P10-25                                  | 1.28 (1.25-1.31)       | 1.30 (1.27-1.34)                  |                        |                      |
| P25-50                                  | 1.51 (1.48-1.55)       | 1.56 (1.52-1.60)                  |                        |                      |
| P50-75                                  | 1.72 (1.68-1.77)       | 1.79 (1.75-1.84)                  |                        |                      |
| P75-90                                  | 1.88 (1.83-1.92)       | 1.96 (1.91-2.02)                  |                        |                      |
| P90-95                                  | 2.03 (1.98-2.09)       | 2.14 (2.08-2.20)                  |                        |                      |
| P>95                                    | 2.05 (1.99-2.11)       | 2.16 (2.10-2.23)                  |                        |                      |

<sup>a</sup> Adjusted odds ratio for gender, age, country of origin, socioeconomic status, years of education, BMI, height and year of examination by multivariable logistic regression model.

CI: confidence interval;

**eTable 3.** Association of cognitive function score (CFS) with myopia among males and females in multivariable models

| CFS      | Males (N=569,551)                 |         | Females (N=452,874)               |         |
|----------|-----------------------------------|---------|-----------------------------------|---------|
|          | Adjusted OR <sup>a</sup> (95% CI) | P value | Adjusted OR <sup>a</sup> (95% CI) | P value |
| <b>1</b> | 0.61 (0.59-0.64)                  | <.001   | 0.51 (0.48-0.55)                  | <.001   |
| <b>2</b> | 0.63 (0.61-0.65)                  |         | 0.60 (0.57-0.62)                  |         |
| <b>3</b> | 0.73 (0.71-0.74)                  |         | 0.73 (0.71-0.75)                  |         |
| <b>4</b> | 0.85 (0.83-0.87)                  |         | 0.86 (0.84-0.88)                  |         |
| <b>5</b> | 1.00 [Reference]                  |         | 1.00 [Reference]                  |         |
| <b>6</b> | 1.20 (1.17-1.22)                  | <.001   | 1.17 (1.15-1.19)                  | <.001   |
| <b>7</b> | 1.40 (1.37-1.43)                  |         | 1.33 (1.30-1.36)                  |         |
| <b>8</b> | 1.63 (1.59-1.66)                  |         | 1.49 (1.46-1.54)                  |         |
| <b>9</b> | 1.95 (1.90-2.00)                  |         | 1.72 (1.66-1.79)                  |         |

<sup>a</sup> Adjusted odds ratio for age, country of origin, socioeconomic status, years of education, BMI, height and year of examination by multivariable logistic regression model.

CI: confidence interval; CFS: cognitive function score;

**eTable 4.** Association of cognitive function score (CFS) with myopia with stratification for years of education in multivariable models

| <b>C<br/>F<br/>S</b> | <b>≤9 years (N=12,793)</b>                  |                | <b>10-11 years (N=53,825)</b>               |                | <b>≥12 years (N=955,807)</b>                |                |
|----------------------|---------------------------------------------|----------------|---------------------------------------------|----------------|---------------------------------------------|----------------|
|                      | <b>Adjusted OR<sup>a</sup><br/>(95% CI)</b> | <b>P-value</b> | <b>Adjusted OR<sup>a</sup><br/>(95% CI)</b> | <b>P-value</b> | <b>Adjusted OR<sup>a</sup><br/>(95% CI)</b> | <b>P-value</b> |
| <b>1</b>             | 0.59 (0.49-0.71)                            | <.001          | 0.66 (0.61-0.72)                            | <.001          | 0.57 (0.54-0.59)                            | <.001          |
| <b>2</b>             | 0.67 (0.56-0.80)                            | <.001          | 0.70 (0.65-0.75)                            | <.001          | 0.61 (0.59-0.62)                            | <.001          |
| <b>3</b>             | 0.73 (0.61-0.87)                            | <.001          | 0.76 (0.71-0.81)                            | <.001          | 0.73 (0.72-0.75)                            | <.001          |
| <b>4</b>             | 0.90 (0.75-1.08)                            | .27            | 0.86 (0.80-0.92)                            | <.001          | 0.86 (0.85-0.87)                            | <.001          |
| <b>5</b>             | 1.00 [Reference]                            |                | 1.00 [Reference]                            |                | 1.00 [Reference]                            |                |
| <b>6</b>             | 1.44 (1.11-1.88)                            | .007           | 1.17 (1.07-1.27)                            | <.001          | 1.18 (1.17-1.30)                            | <.001          |
| <b>7</b>             | 1.41 (0.97-2.05)                            | .075           | 1.23 (1.10-1.38)                            | <.001          | 1.37 (1.35-1.39)                            | <.001          |
| <b>8</b>             | 2.20 (1.16-4.15)                            | .015           | 1.41 (1.20-1.67)                            | <.001          | 1.57 (1.54-1.60)                            | <.001          |
| <b>9</b>             | 2.46 (0.92-6.59)                            | .072           | 1.29 (1.00-1.67)                            | .046           | 1.87 (1.83-1.91)                            | <.001          |

<sup>a</sup> Adjusted odds ratio for age, gender, country of origin, socioeconomic status, BMI, height and year of examination by multivariable logistic regression model.

CI: confidence interval; CFS: cognitive function score;

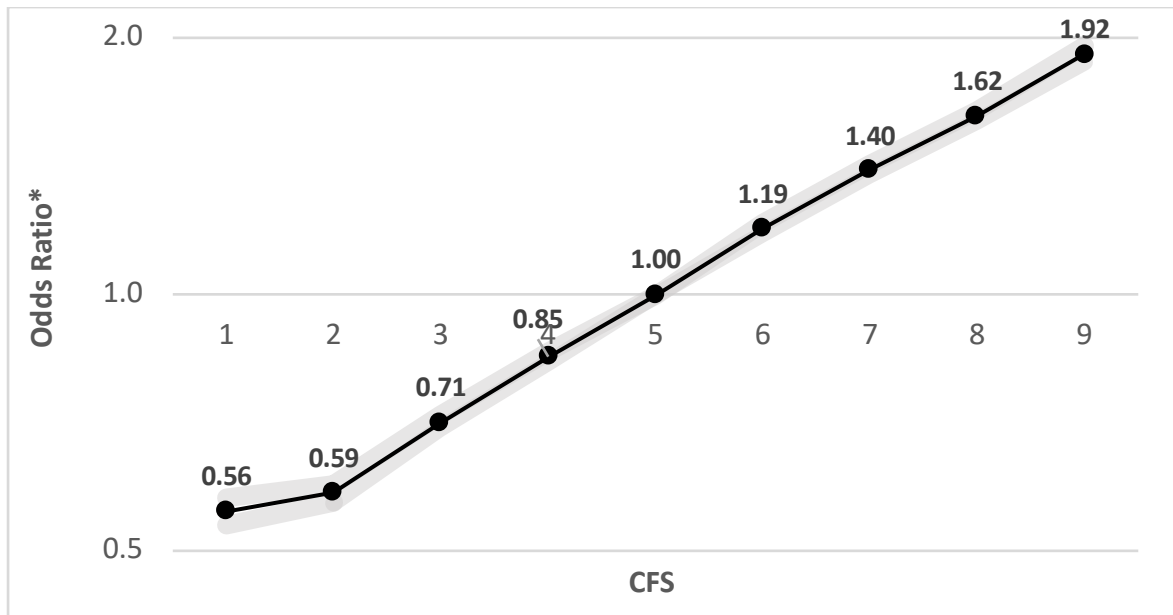

**eFigure 1. Sensitivity analysis of the association of cognitive function score (CFS) with stricter definition of myopia ( $\leq -1.00$  Diopter).** Values represent the odds ratio for each CFS group in comparison with the intermediate CFS. Gray area represents the 95% confidence interval.  $P < .001$  for all comparisons. Adjusted odds ratio for age, gender, country of origin, socioeconomic status, years of education, BMI, height and year of examination by multivariable logistic regression model. (CFS, cognitive function score).
